# Supplementary material
Source: PubMed Central journal article supplement (PMC5758389)
Supplement: BPH-175-335-s001.pdf [file BPH-175-335-s001.pdf]

## **SUPPLEMENTARY FIGURE LEGENDS**

**Supplementary figure 1.** Quantification of weight loss, expressed as percentage of initial weight, in mice upon induction of acute pancreatitis. Results are average  $\pm$  SEM (n=5), \*P < 0.05.

**Supplementary figure 2.** qPCR of ADM marker Ck19. Results are average  $\pm$  SEM (n=5), \*P < 0.05.

**Supplementary figure 3.** (A) Quantification of TUNEL-positive apoptotic acinar cells after induction of pancreatitis. Right panel, representative microphotograph of stained cells. (B) Quantification of DNA damage in acinar cells upon  $\gamma$ H2A.X staining after induction of pancreatitis. Right panel, representative microphotograph of stained cells. Results are average  $\pm$  SEM (n=5), \*P < 0.05. Scale bars: 50  $\mu$ M.

**Supplementary figure 4.** Quantification of cleaved-caspase 3 (CC3)-positive apoptotic acinar cells following mitogenic stimulation with T3. Results are average  $\pm$  SEM (n=5), \*P < 0.05.

**Supplementary figure 5.** Quantification of live cell number after incubating AR42J acinar cells with different concentrations of ibuprofen for 72 hours. “Seeded” indicates the initial number of seeded cells. Results are average  $\pm$  SEM (n=3), \*P < 0.05.

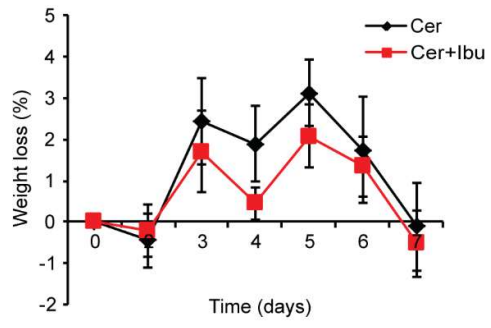

Figure S1

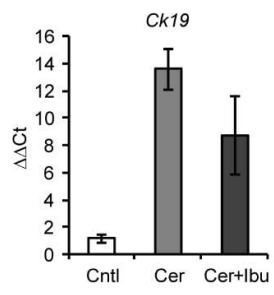

Figure S2

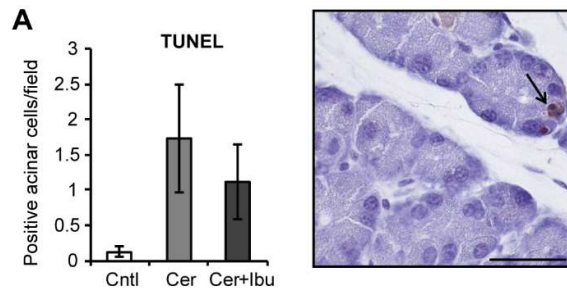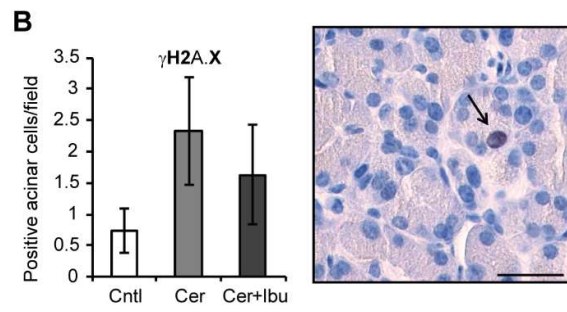

Figure S3

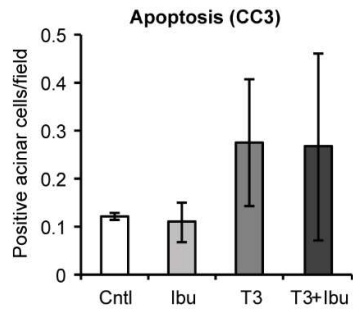

Figure S4

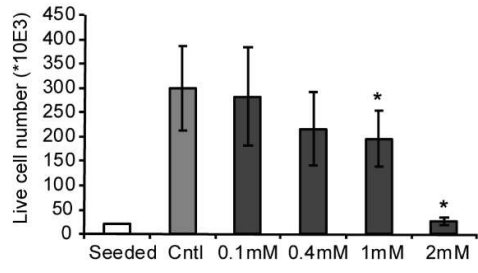

Figure S5
